# Supplementary material
Source: PubMed Central journal article supplement (PMC5024783)
Supplement: NIHMS812120-supplement.pdf [file NIHMS812120-supplement.pdf]

**(online only) Table S1. Characteristics of Stage II-III rectal cancer patients by density level of radiation oncologists**

| Categories                             | No RO                     | RO Q1 (low)               | RO Q2                     | RO Q3                     | RO Q4 (high)          | $\chi^2$ p-value |
|----------------------------------------|---------------------------|---------------------------|---------------------------|---------------------------|-----------------------|------------------|
|                                        | N=7467<br>(27.8)<br>N (%) | N=5609<br>(20.9)<br>N (%) | N=5993<br>(22.3)<br>N (%) | N=5254<br>(19.6)<br>N (%) | N=2522 (9.4)<br>N (%) |                  |
| <b>Radiation Therapy</b>               |                           |                           |                           |                           |                       |                  |
| No RT within 180 days of diagnosis     | 2056 (27.53)              | 1832 (32.66)              | 1889 (31.52)              | 1663 (31.65)              | 729 (28.91)           | < 0.0001         |
| have RT within 180 days of diagnosis   | 5411 (72.47)              | 3777 (67.34)              | 4104 (68.48)              | 3591 (68.35)              | 1793 (71.09)          |                  |
| <b>Travel Distance</b>                 |                           |                           |                           |                           |                       |                  |
| 0-12.49 miles                          | 1696 (22.71)              | 2970 (52.95)              | 3253 (54.28)              | 3081 (58.64)              | 1302 (51.63)          | < 0.0001         |
| 12.5-49.9 miles                        | 3563 (47.72)              | 2100 (37.44)              | 2274 (37.94)              | 1814 (34.53)              | 881 (34.93)           |                  |
| 50-249 miles                           | 2064 (27.64)              | 477 (8.5)                 | 402 (6.71)                | 310 (5.9)                 | 299 (11.86)           |                  |
| ≥250 miles                             | 144 (1.93)                | 62 (1.11)                 | 64 (1.07)                 | 49 (0.93)                 | 40 (1.59)             |                  |
| <b>Age Group</b>                       |                           |                           |                           |                           |                       |                  |
| 18-50                                  | 1655 (22.16)              | 1334 (23.78)              | 1429 (23.84)              | 1306 (24.86)              | 593 (23.51)           | 0.022            |
| 51-64                                  | 3030 (40.58)              | 2269 (40.45)              | 2423 (40.43)              | 2052 (39.06)              | 1005 (39.85)          |                  |
| 65-70                                  | 1325 (17.74)              | 916 (16.33)               | 950 (15.85)               | 834 (15.87)               | 435 (17.25)           |                  |
| 71-75                                  | 828 (11.09)               | 602 (10.73)               | 636 (10.61)               | 588 (11.19)               | 287 (11.38)           |                  |
| 76-80                                  | 629 (8.42)                | 488 (8.7)                 | 555 (9.26)                | 474 (9.02)                | 202 (8.01)            |                  |
| <b>Gender</b>                          |                           |                           |                           |                           |                       |                  |
| Male                                   | 4568 (61.18)              | 3368 (60.05)              | 3662 (61.1)               | 3074 (58.51)              | 1499 (59.44)          | 0.018            |
| Female                                 | 2899 (38.82)              | 2241 (39.95)              | 2331 (38.9)               | 2180 (41.49)              | 1023 (40.56)          |                  |
| <b>Race/Ethnicity</b>                  |                           |                           |                           |                           |                       |                  |
| Non-Hispanic white                     | 6072 (81.32)              | 3920 (69.89)              | 4300 (71.75)              | 3713 (70.67)              | 1934 (76.69)          | < 0.0001         |
| Hispanic                               | 235 (3.15)                | 437 (7.79)                | 429 (7.16)                | 273 (5.2)                 | 113 (4.48)            |                  |
| Black                                  | 343 (4.59)                | 543 (9.68)                | 563 (9.39)                | 600 (11.42)               | 211 (8.37)            |                  |
| Others                                 | 213 (2.85)                | 355 (6.33)                | 345 (5.76)                | 259 (4.93)                | 114 (4.52)            |                  |
| Missing                                | 604 (8.09)                | 354 (6.31)                | 356 (5.94)                | 409 (7.78)                | 150 (5.95)            |                  |
| <b>Insurance</b>                       |                           |                           |                           |                           |                       |                  |
| Uninsured, self-pay                    | 212 (2.84)                | 198 (3.53)                | 157 (2.62)                | 179 (3.41)                | 90 (3.57)             | < 0.0001         |
| Uninsured, charity                     | 119 (1.59)                | 111 (1.98)                | 137 (2.29)                | 66 (1.26)                 | 26 (1.03)             |                  |
| Medicaid                               | 440 (5.89)                | 334 (5.95)                | 358 (5.97)                | 344 (6.55)                | 162 (6.42)            |                  |
| Younger Medicare                       | 379 (5.08)                | 233 (4.15)                | 263 (4.39)                | 212 (4.04)                | 107 (4.24)            |                  |
| Older Medicare                         | 2321 (31.08)              | 1630 (29.06)              | 1720 (28.7)               | 1519 (28.91)              | 749 (29.7)            |                  |
| Private                                | 3898 (52.2)               | 3036 (54.13)              | 3295 (54.98)              | 2841 (54.07)              | 1343 (53.25)          |                  |
| Missing                                | 98 (1.31)                 | 67 (1.19)                 | 63 (1.05)                 | 93 (1.77)                 | 45 (1.78)             |                  |
| <b>Diagnosis Year</b>                  |                           |                           |                           |                           |                       |                  |
| 2007                                   | 1926 (25.79)              | 1477 (26.33)              | 1599 (26.68)              | 1446 (27.52)              | 665 (26.37)           | 0.17             |
| 2008                                   | 1928 (25.82)              | 1458 (25.99)              | 1474 (24.6)               | 1271 (24.19)              | 614 (24.35)           |                  |
| 2009                                   | 1815 (24.31)              | 1316 (23.46)              | 1509 (25.18)              | 1244 (23.68)              | 635 (25.18)           |                  |
| 2010                                   | 1798 (24.08)              | 1358 (24.21)              | 1411 (23.54)              | 1293 (24.61)              | 608 (24.11)           |                  |
| <b>Stage</b>                           |                           |                           |                           |                           |                       |                  |
| Stage II                               | 3078 (41.22)              | 2410 (42.97)              | 2460 (41.05)              | 2222 (42.29)              | 1032 (40.92)          | 0.15             |
| Stage III                              | 4389 (58.78)              | 3199 (57.03)              | 3533 (58.95)              | 3032 (57.71)              | 1490 (59.08)          |                  |
| <b>Rural/Urban</b>                     |                           |                           |                           |                           |                       |                  |
| Rural                                  | 3328 (44.57)              | 558 (9.95)                | 598 (9.98)                | 451 (8.58)                | 452 (17.92)           | < 0.0001         |
| Urban                                  | 4032 (54)                 | 4948 (88.22)              | 5289 (88.25)              | 4700 (89.46)              | 2019 (80.06)          |                  |
| Unknown                                | 107 (1.43)                | 103 (1.84)                | 106 (1.77)                | 103 (1.96)                | 51 (2.02)             |                  |
| <b>Region</b>                          |                           |                           |                           |                           |                       |                  |
| Northeast                              | 1556 (20.84)              | 945 (16.85)               | 809 (13.5)                | 1185 (22.55)              | 556 (22.05)           | < 0.0001         |
| Midwest                                | 2326 (31.15)              | 1409 (25.12)              | 1439 (24.01)              | 1358 (25.85)              | 833 (33.03)           |                  |
| South                                  | 2663 (35.66)              | 2315 (41.27)              | 2495 (41.63)              | 1891 (35.99)              | 762 (30.21)           |                  |
| West                                   | 922 (12.35)               | 940 (16.76)               | 1250 (20.86)              | 820 (15.61)               | 371 (14.71)           |                  |
| <b>Median Income-Quartile 2000</b>     |                           |                           |                           |                           |                       |                  |
| <\$30,000                              | 1332 (17.84)              | 710 (12.66)               | 787 (13.13)               | 654 (12.45)               | 278 (11.02)           | < 0.0001         |
| \$30,000- \$34,999                     | 1901 (25.46)              | 892 (15.9)                | 1012 (16.89)              | 821 (15.63)               | 455 (18.04)           |                  |
| \$35,000- \$45,999                     | 2052 (27.48)              | 1528 (27.24)              | 1744 (29.1)               | 1417 (26.97)              | 687 (27.24)           |                  |
| \$46,000+                              | 2083 (27.9)               | 2411 (42.98)              | 2367 (39.5)               | 2300 (43.78)              | 1079 (42.78)          |                  |
| Missing                                | 99 (1.33)                 | 68 (1.21)                 | 83 (1.38)                 | 62 (1.18)                 | 23 (0.91)             |                  |
| <b>Facility Type</b>                   |                           |                           |                           |                           |                       |                  |
| Community Cancer Program               | 1190 (15.94)              | 601 (10.71)               | 444 (7.41)                | 439 (8.36)                | 265 (10.51)           | < 0.0001         |
| Comprehensive Community Cancer Program | 3522 (47.17)              | 2944 (52.49)              | 2872 (47.92)              | 2373 (45.17)              | 1097 (43.5)           |                  |
| Academic Comprehensive Cancer          | 1391 (18.63)              | 1217 (21.7)               | 1449 (24.18)              | 1240 (23.6)               | 555 (22.01)           |                  |

|                                          |                     |              |              |              |              |              |          |
|------------------------------------------|---------------------|--------------|--------------|--------------|--------------|--------------|----------|
|                                          | Program             |              |              |              |              |              |          |
|                                          | NCI Program/Network | 702 (9.4)    | 507 (9.04)   | 472 (7.88)   | 443 (8.43)   | 393 (15.58)  |          |
|                                          | Other               | 662 (8.87)   | 340 (6.06)   | 756 (12.61)  | 759 (14.45)  | 212 (8.41)   |          |
| <b>Charlson Comorbidity Score</b>        |                     |              |              |              |              |              |          |
|                                          | 0                   | 5662 (75.83) | 4367 (77.86) | 4616 (77.02) | 3990 (75.94) | 1941 (76.96) | 0.10     |
|                                          | 1                   | 1364 (18.27) | 908 (16.19)  | 1007 (16.8)  | 934 (17.78)  | 438 (17.37)  |          |
|                                          | 2+                  | 441 (5.91)   | 334 (5.95)   | 370 (6.17)   | 330 (6.28)   | 143 (5.67)   |          |
| <b>Diagnosed at reporting facilities</b> |                     |              |              |              |              |              |          |
|                                          | Yes                 | 3339 (44.72) | 3183 (56.75) | 3587 (59.85) | 3067 (58.37) | 1431 (56.74) | < 0.0001 |
|                                          | No                  | 4128 (55.28) | 2426 (43.25) | 2406 (40.15) | 2187 (41.63) | 1091 (43.26) |          |

\*RO, Radiation Oncologist; RT, Radiation Therapy; NCI, National Cancer Institute

**(Online Only) Table S2. Characteristics of Stage II-III rectal cancer patients by travel distance and by diagnosis location**  
**(A) Overall**

| Categories                                  | Travel 0-12.49 miles<br>N=12302 (45.8)<br>N (%) | Travel 12.5-49.9 miles<br>N=10632 (39.6)<br>N (%) | Travel 50-249 miles<br>N=3552(13.2)<br>N (%) | Travel ≥250 miles<br>N=359 (1.3)<br>N (%) | χ <sup>2</sup> p-value |
|---------------------------------------------|-------------------------------------------------|---------------------------------------------------|----------------------------------------------|-------------------------------------------|------------------------|
| <b>Radiation Therapy</b>                    |                                                 |                                                   |                                              |                                           |                        |
| No RT within 180 days of diagnosis          | 4022 (32.69)                                    | 3082 (28.99)                                      | 959 (27)                                     | 106 (29.53)                               | < 0.0001               |
| have RT within 180 days of diagnosis        | 8280 (67.31)                                    | 7550 (71.01)                                      | 2593 (73)                                    | 253 (70.47)                               |                        |
| <b>Density of Radiation Oncologist (RO)</b> |                                                 |                                                   |                                              |                                           |                        |
| no RO                                       | 1696 (13.79)                                    | 3563 (33.51)                                      | 2064 (58.11)                                 | 144 (40.11)                               | < 0.0001               |
| RO_Q1 (low)                                 | 2970 (24.14)                                    | 2100 (19.75)                                      | 477 (13.43)                                  | 62 (17.27)                                |                        |
| RO_Q2                                       | 3253 (26.44)                                    | 2274 (21.39)                                      | 402 (11.32)                                  | 64 (17.83)                                |                        |
| RO_Q3                                       | 3081 (25.04)                                    | 1814 (17.06)                                      | 310 (8.73)                                   | 49 (13.65)                                |                        |
| RO_Q4(high)                                 | 1302 (10.58)                                    | 881 (8.29)                                        | 299 (8.42)                                   | 40 (11.14)                                |                        |
| <b>Age Group</b>                            |                                                 |                                                   |                                              |                                           |                        |
| 18-50                                       | 2714 (22.06)                                    | 2662 (25.04)                                      | 860 (24.21)                                  | 81 (22.56)                                | < 0.0001               |
| 51-64                                       | 4820 (39.18)                                    | 4381 (41.21)                                      | 1427 (40.17)                                 | 151 (42.06)                               |                        |
| 65-70                                       | 2039 (16.57)                                    | 1692 (15.91)                                      | 656 (18.47)                                  | 73 (20.33)                                |                        |
| 71-75                                       | 1441 (11.71)                                    | 1122 (10.55)                                      | 344 (9.68)                                   | 34 (9.47)                                 |                        |
| 76-80                                       | 1288 (10.47)                                    | 775 (7.29)                                        | 265 (7.46)                                   | 20 (5.57)                                 |                        |
| <b>Gender</b>                               |                                                 |                                                   |                                              |                                           |                        |
| Male                                        | 7206 (58.58)                                    | 6574 (61.83)                                      | 2166 (60.98)                                 | 225 (62.67)                               | < 0.0001               |
| Female                                      | 5096 (41.42)                                    | 4058 (38.17)                                      | 1386 (39.02)                                 | 134 (37.33)                               |                        |
| <b>Race/Ethnicity</b>                       |                                                 |                                                   |                                              |                                           |                        |
| Non-Hispanic white                          | 8530 (69.34)                                    | 8252 (77.61)                                      | 2867 (80.72)                                 | 290 (80.78)                               | < 0.0001               |
| Hispanic                                    | 869 (7.06)                                      | 488 (4.59)                                        | 114 (3.21)                                   | 16 (4.46)                                 |                        |
| Black                                       | 1410 (11.46)                                    | 654 (6.15)                                        | 183 (5.15)                                   | 13 (3.62)                                 |                        |
| Others                                      | 743 (6.04)                                      | 414 (3.89)                                        | 112 (3.15)                                   | 17 (4.74)                                 |                        |
| Missing                                     | 750 (6.1)                                       | 824 (7.75)                                        | 276 (7.77)                                   | 23 (6.41)                                 |                        |
| <b>Insurance</b>                            |                                                 |                                                   |                                              |                                           |                        |
| Uninsured, self-pay                         | 404 (3.28)                                      | 328 (3.09)                                        | 98 (2.76)                                    | 6 (1.67)                                  | < 0.0001               |
| Uninsured, charity                          | 206 (1.67)                                      | 187 (1.76)                                        | 65 (1.83)                                    | 1 (0.28)                                  |                        |
| Medicaid                                    | 832 (6.76)                                      | 586 (5.51)                                        | 213 (6)                                      | 7 (1.95)                                  |                        |
| Younger Medicare                            | 557 (4.53)                                      | 427 (4.02)                                        | 200 (5.63)                                   | 10 (2.79)                                 |                        |
| Older Medicare                              | 3789 (30.8)                                     | 2952 (27.77)                                      | 1089 (30.66)                                 | 109 (30.36)                               |                        |
| Private                                     | 6373 (51.8)                                     | 6006 (56.49)                                      | 1824 (51.35)                                 | 210 (58.5)                                |                        |
| Missing                                     | 141 (1.15)                                      | 146 (1.37)                                        | 63 (1.77)                                    | 16 (4.46)                                 |                        |
| <b>Diagnosis Year</b>                       |                                                 |                                                   |                                              |                                           |                        |
| 2007                                        | 3331 (27.08)                                    | 2744 (25.81)                                      | 931 (26.21)                                  | 107 (29.81)                               | 0.017                  |
| 2008                                        | 3159 (25.68)                                    | 2640 (24.83)                                      | 857 (24.13)                                  | 89 (24.79)                                |                        |
| 2009                                        | 2971 (24.15)                                    | 2576 (24.23)                                      | 889 (25.03)                                  | 83 (23.12)                                |                        |
| 2010                                        | 2841 (23.09)                                    | 2672 (25.13)                                      | 875 (24.63)                                  | 80 (22.28)                                |                        |
| <b>Stage</b>                                |                                                 |                                                   |                                              |                                           |                        |
| Stage II                                    | 5200 (42.27)                                    | 4321 (40.64)                                      | 1520 (42.79)                                 | 161 (44.85)                               | 0.021                  |
| Stage III                                   | 7102 (57.73)                                    | 6311 (59.36)                                      | 2032 (57.21)                                 | 198 (55.15)                               |                        |
| <b>Rural/Urban</b>                          |                                                 |                                                   |                                              |                                           |                        |
| Rural                                       | 534 (4.34)                                      | 2277 (21.42)                                      | 2413 (67.93)                                 | 163 (45.4)                                | < 0.0001               |
| Urban                                       | 11541 (93.81)                                   | 8171 (76.85)                                      | 1087 (30.6)                                  | 189 (52.65)                               |                        |
| Unknown                                     | 227 (1.85)                                      | 184 (1.73)                                        | 52 (1.46)                                    | 7 (1.95)                                  |                        |
| <b>Region</b>                               |                                                 |                                                   |                                              |                                           |                        |
| Northeast                                   | 2778 (22.58)                                    | 1868 (17.57)                                      | 386 (10.87)                                  | 19 (5.29)                                 | < 0.0001               |

|                                    |                                        |              |              |              |             |          |
|------------------------------------|----------------------------------------|--------------|--------------|--------------|-------------|----------|
|                                    | Midwest                                | 3296 (26.79) | 2875 (27.04) | 1113 (31.33) | 81 (22.56)  |          |
|                                    | South                                  | 4101 (33.34) | 4360 (41.01) | 1512 (42.57) | 153 (42.62) |          |
|                                    | West                                   | 2127 (17.29) | 1529 (14.38) | 541 (15.23)  | 106 (29.53) |          |
| <b>Median Income-Quartile 2000</b> |                                        |              |              |              |             |          |
|                                    | <\$30,000                              | 1567 (12.74) | 1052 (9.89)  | 1067 (30.04) | 75 (20.89)  | < 0.0001 |
|                                    | \$30,000- \$34,999                     | 1947 (15.83) | 1891 (17.79) | 1149 (32.35) | 94 (26.18)  |          |
|                                    | \$35,000- \$45,999                     | 3504 (28.48) | 2979 (28.02) | 863 (24.3)   | 82 (22.84)  |          |
|                                    | \$46,000+                              | 5132 (41.72) | 4581 (43.09) | 429 (12.08)  | 98 (27.3)   |          |
|                                    | Missing                                | 152 (1.24)   | 129 (1.21)   | 44 (1.24)    | 10 (2.79)   |          |
| <b>Facility Type</b>               |                                        |              |              |              |             |          |
|                                    | Community Cancer Program               | 1593 (12.95) | 1176 (11.06) | 152 (4.28)   | 18 (5.01)   | < 0.0001 |
|                                    | Comprehensive Community Cancer Program | 6023 (48.96) | 5085 (47.83) | 1580 (44.48) | 120 (33.43) |          |
|                                    | Academic Comprehensive Cancer Program  | 2687 (21.84) | 2275 (21.4)  | 834 (23.48)  | 56 (15.6)   |          |
|                                    | NCI Program/Network                    | 582 (4.73)   | 1004 (9.44)  | 777 (21.88)  | 154 (42.9)  |          |
|                                    | Other                                  | 1417 (11.52) | 1092 (10.27) | 209 (5.88)   | 11 (3.06)   |          |
| <b>Charlson Comorbidity Score</b>  |                                        |              |              |              |             |          |
|                                    | 0                                      | 9354 (76.04) | 8225 (77.36) | 2702 (76.07) | 295 (82.17) | 0.003    |
|                                    | 1                                      | 2139 (17.39) | 1818 (17.1)  | 645 (18.16)  | 49 (13.65)  |          |
|                                    | 2+                                     | 809 (6.58)   | 589 (5.54)   | 205 (5.77)   | 15 (4.18)   |          |
| <b>Diagnosis location</b>          |                                        |              |              |              |             |          |
|                                    | Diagnosed elsewhere                    | 4097 (33.3)  | 5281 (49.67) | 2571 (72.38) | 289 (80.5)  | < 0.0001 |
|                                    | Diagnosed at reporting facility        | 8205 (66.7)  | 5351 (50.33) | 981 (27.62)  | 70 (19.5)   |          |

\* RT, Radiation Therapy; NCI, National Cancer Institute

**(B) Among patients diagnosed at reporting facility**

| Categories                                  | Travel 0-12.49 miles   | Travel 12.5-49.9 miles | Travel 50-249 miles | Travel ≥250 miles  | χ <sup>2</sup> p-value |
|---------------------------------------------|------------------------|------------------------|---------------------|--------------------|------------------------|
|                                             | N=8205 (56.2)<br>N (%) | N=5351 (36.6)<br>N (%) | N=981(6.7)<br>N (%) | N=70(0.9)<br>N (%) |                        |
| <b>Radiation Therapy</b>                    |                        |                        |                     |                    |                        |
| No RT within 180 days of diagnosis          | 2881 (35.11)           | 1831 (34.22)           | 371 (37.82)         | 36 (51.43)         | 0.004                  |
| Have RT within 180 days of diagnosis        | 5324 (64.89)           | 3520 (65.78)           | 610 (62.18)         | 34 (48.57)         |                        |
| <b>Density of Radiation Oncologist (RO)</b> |                        |                        |                     |                    |                        |
| no RO                                       | 1170 (14.26)           | 1593 (29.77)           | 549 (55.96)         | 27 (38.57)         | < 0.0001               |
| RO_Q1 (low)                                 | 1952 (23.79)           | 1072 (20.03)           | 147 (14.98)         | 12 (17.14)         |                        |
| RO_Q2                                       | 2178 (26.54)           | 1259 (23.53)           | 135 (13.76)         | 15 (21.43)         |                        |
| RO_Q3                                       | 2018 (24.59)           | 968 (18.09)            | 72 (7.34)           | 9 (12.86)          |                        |
| RO_Q4(high)                                 | 887 (10.81)            | 459 (8.58)             | 78 (7.95)           | 7 (10)             |                        |
| <b>Age Group</b>                            |                        |                        |                     |                    |                        |
| 18-50                                       | 1738 (21.18)           | 1277 (23.86)           | 212 (21.61)         | 9 (12.86)          | < 0.0001               |
| 51-64                                       | 3164 (38.56)           | 2228 (41.64)           | 375 (38.23)         | 34 (48.57)         |                        |
| 65-70                                       | 1387 (16.9)            | 843 (15.75)            | 199 (20.29)         | 15 (21.43)         |                        |
| 71-75                                       | 1002 (12.21)           | 593 (11.08)            | 106 (10.81)         | 6 (8.57)           |                        |
| 76-80                                       | 914 (11.14)            | 410 (7.66)             | 89 (9.07)           | 6 (8.57)           |                        |
| <b>Gender</b>                               |                        |                        |                     |                    |                        |
| Male                                        | 4796 (58.45)           | 3258 (60.89)           | 607 (61.88)         | 42 (60)            | 0.016                  |
| Female                                      | 3409 (41.55)           | 2093 (39.11)           | 374 (38.12)         | 28 (40)            |                        |
| <b>Race/Ethnicity</b>                       |                        |                        |                     |                    |                        |
| Non-Hispanic white                          | 5754 (70.13)           | 4171 (77.95)           | 766 (78.08)         | 50 (71.43)         | < 0.0001               |
| Hispanic                                    | 538 (6.56)             | 243 (4.54)             | 37 (3.77)           | 4 (5.71)           |                        |
| Black                                       | 970 (11.82)            | 351 (6.56)             | 67 (6.83)           | 6 (8.57)           |                        |
| Others                                      | 435 (5.3)              | 187 (3.49)             | 35 (3.57)           | 4 (5.71)           |                        |
| Missing                                     | 508 (6.19)             | 399 (7.46)             | 76 (7.75)           | 6 (8.57)           |                        |
| <b>Insurance</b>                            |                        |                        |                     |                    |                        |
| Uninsured, self-pay                         | 315 (3.84)             | 200 (3.74)             | 38 (3.87)           | 1 (1.43)           | < 0.0001               |
| Uninsured, charity                          | 162 (1.97)             | 122 (2.28)             | 27 (2.75)           | 0 (0)              |                        |
| Medicaid                                    | 590 (7.19)             | 298 (5.57)             | 47 (4.79)           | 4 (5.71)           |                        |
| Younger Medicare                            | 370 (4.51)             | 226 (4.22)             | 62 (6.32)           | 2 (2.86)           |                        |
| Older Medicare                              | 2636 (32.13)           | 1533 (28.65)           | 337 (34.35)         | 23 (32.86)         |                        |
| Private                                     | 4047 (49.32)           | 2901 (54.21)           | 452 (46.08)         | 37 (52.86)         |                        |
| Missing                                     | 85 (1.04)              | 71 (1.33)              | 18 (1.83)           | 3 (4.29)           |                        |
| <b>Diagnosis Year</b>                       |                        |                        |                     |                    |                        |
| 2007                                        | 2289 (27.9)            | 1401 (26.18)           | 257 (26.2)          | 22 (31.43)         | 0.019                  |
| 2008                                        | 2124 (25.89)           | 1322 (24.71)           | 221 (22.53)         | 17 (24.29)         |                        |
| 2009                                        | 1944 (23.69)           | 1313 (24.54)           | 246 (25.08)         | 15 (21.43)         |                        |
| 2010                                        | 1848 (22.52)           | 1315 (24.57)           | 257 (26.2)          | 16 (22.86)         |                        |
| <b>Stage</b>                                |                        |                        |                     |                    |                        |
| Stage II                                    | 3545 (43.21)           | 2246 (41.97)           | 413 (42.1)          | 24 (34.29)         | 0.24                   |
| Stage III                                   | 4660 (56.79)           | 3105 (58.03)           | 568 (57.9)          | 46 (65.71)         |                        |
| <b>Rural/Urban</b>                          |                        |                        |                     |                    |                        |
| Rural                                       | 420 (5.12)             | 1185 (22.15)           | 682 (69.52)         | 34 (48.57)         | < 0.0001               |
| Urban                                       | 7639 (93.1)            | 4095 (76.53)           | 283 (28.85)         | 35 (50)            |                        |
| Unknown                                     | 146 (1.78)             | 71 (1.33)              | 16 (1.63)           | 1 (1.43)           |                        |
| <b>Region</b>                               |                        |                        |                     |                    |                        |
| Northeast                                   | 1885 (22.97)           | 780 (14.58)            | 104 (10.6)          | 3 (4.29)           | < 0.0001               |
| Midwest                                     | 2361 (28.78)           | 1513 (28.28)           | 284 (28.95)         | 13 (18.57)         |                        |
| South                                       | 2652 (32.32)           | 2287 (42.74)           | 423 (43.12)         | 33 (47.14)         |                        |
| West                                        | 1307 (15.93)           | 771 (14.41)            | 170 (17.33)         | 21 (30)            |                        |
| <b>Median Income-Quartile 2000</b>          |                        |                        |                     |                    |                        |
| <\$30,000                                   | 1089 (13.27)           | 575 (10.75)            | 328 (33.44)         | 16 (22.86)         | < 0.0001               |
| \$30,000- \$34,999                          | 1324 (16.14)           | 985 (18.41)            | 309 (31.5)          | 17 (24.29)         |                        |

|                                   |                                        |              |              |             |            |          |
|-----------------------------------|----------------------------------------|--------------|--------------|-------------|------------|----------|
|                                   | \$35,000- \$45,999                     | 2372 (28.91) | 1542 (28.82) | 207 (21.1)  | 12 (17.14) |          |
|                                   | \$46,000+                              | 3307 (40.3)  | 2196 (41.04) | 120 (12.23) | 21 (30)    |          |
|                                   | Missing                                | 113 (1.38)   | 53 (0.99)    | 17 (1.73)   | 4 (5.71)   |          |
| <b>Facility Type</b>              |                                        |              |              |             |            |          |
|                                   | Community Cancer Program               | 1189 (14.49) | 719 (13.44)  | 47 (4.79)   | 4 (5.71)   | < 0.0001 |
|                                   | Comprehensive Community Cancer Program | 4104 (50.02) | 2799 (52.31) | 580 (59.12) | 34 (48.57) |          |
|                                   | Academic Comprehensive Cancer Program  | 1775 (21.63) | 1075 (20.09) | 188 (19.16) | 9 (12.86)  |          |
|                                   | NCI Program/Network                    | 242 (2.95)   | 192 (3.59)   | 105 (10.7)  | 17 (24.29) |          |
|                                   | Other                                  | 895 (10.91)  | 566 (10.58)  | 61 (6.22)   | 6 (8.57)   |          |
| <b>Charlson Comorbidity Score</b> |                                        |              |              |             |            |          |
|                                   | 0                                      | 6079 (74.09) | 3996 (74.68) | 739 (75.33) | 54 (77.14) | 0.59     |
|                                   | 1                                      | 1503 (18.32) | 992 (18.54)  | 176 (17.94) | 10 (14.29) |          |
|                                   | 2+                                     | 623 (7.59)   | 363 (6.78)   | 66 (6.73)   | 6 (8.57)   |          |

---

\* RT, Radiation Therapy; NCI, National Cancer Institute

**(C) Among patients diagnosed elsewhere**

| Categories                                  | Travel 0-12.49 miles   | Travel 12.5-49.9 miles | Travel 50-249 miles  | Travel ≥250 miles    | χ <sup>2</sup> p-value |
|---------------------------------------------|------------------------|------------------------|----------------------|----------------------|------------------------|
|                                             | N=4097 (33.5)<br>N (%) | N=5281 (43.2)<br>N (%) | N=2571 (21)<br>N (%) | N=289 (2.4)<br>N (%) |                        |
| <b>Radiation Therapy</b>                    |                        |                        |                      |                      |                        |
| No RT within 180 days of diagnosis          | 1141 (27.85)           | 1251 (23.69)           | 588 (22.87)          | 70 (24.22)           | < 0.0001               |
| Have RT within 180 days of diagnosis        | 2956 (72.15)           | 4030 (76.31)           | 1983 (77.13)         | 219 (75.78)          |                        |
| <b>Density of Radiation Oncologist (RO)</b> |                        |                        |                      |                      |                        |
| no RO                                       | 526 (12.84)            | 1970 (37.3)            | 1515 (58.93)         | 117 (40.48)          | < 0.0001               |
| RO_Q1 (low)                                 | 1018 (24.85)           | 1028 (19.47)           | 330 (12.84)          | 50 (17.3)            |                        |
| RO_Q2                                       | 1075 (26.24)           | 1015 (19.22)           | 267 (10.39)          | 49 (16.96)           |                        |
| RO_Q3                                       | 1063 (25.95)           | 846 (16.02)            | 238 (9.26)           | 40 (13.84)           |                        |
| RO_Q4(high)                                 | 415 (10.13)            | 422 (7.99)             | 221 (8.6)            | 33 (11.42)           |                        |
| <b>Age Group</b>                            |                        |                        |                      |                      |                        |
| 18-50                                       | 976 (23.82)            | 1385 (26.23)           | 648 (25.2)           | 72 (24.91)           | 0.0004                 |
| 51-64                                       | 1656 (40.42)           | 2153 (40.77)           | 1052 (40.92)         | 117 (40.48)          |                        |
| 65-70                                       | 652 (15.91)            | 849 (16.08)            | 457 (17.78)          | 58 (20.07)           |                        |
| 71-75                                       | 439 (10.72)            | 529 (10.02)            | 238 (9.26)           | 28 (9.69)            |                        |
| 76-80                                       | 374 (9.13)             | 365 (6.91)             | 176 (6.85)           | 14 (4.84)            |                        |
| <b>Gender</b>                               |                        |                        |                      |                      |                        |
| Male                                        | 2410 (58.82)           | 3316 (62.79)           | 1559 (60.64)         | 183 (63.32)          | 0.0011                 |
| Female                                      | 1687 (41.18)           | 1965 (37.21)           | 1012 (39.36)         | 106 (36.68)          |                        |
| <b>Race/Ethnicity</b>                       |                        |                        |                      |                      |                        |
| Non-Hispanic white                          | 2776 (67.76)           | 4081 (77.28)           | 2101 (81.72)         | 240 (83.04)          | < 0.0001               |
| Hispanic                                    | 331 (8.08)             | 245 (4.64)             | 77 (2.99)            | 12 (4.15)            |                        |
| Black                                       | 440 (10.74)            | 303 (5.74)             | 116 (4.51)           | 7 (2.42)             |                        |
| Others                                      | 308 (7.52)             | 227 (4.3)              | 77 (2.99)            | 13 (4.5)             |                        |
| Missing                                     | 242 (5.91)             | 425 (8.05)             | 200 (7.78)           | 17 (5.88)            |                        |
| <b>Insurance</b>                            |                        |                        |                      |                      |                        |
| Uninsured, self-pay                         | 89 (2.17)              | 128 (2.42)             | 60 (2.33)            | 5 (1.73)             | < 0.0001               |
| Uninsured, charity                          | 44 (1.07)              | 65 (1.23)              | 38 (1.48)            | 1 (0.35)             |                        |
| Medicaid                                    | 242 (5.91)             | 288 (5.45)             | 166 (6.46)           | 3 (1.04)             |                        |
| Younger Medicare                            | 187 (4.56)             | 201 (3.81)             | 138 (5.37)           | 8 (2.77)             |                        |
| Older Medicare                              | 1153 (28.14)           | 1419 (26.87)           | 752 (29.25)          | 86 (29.76)           |                        |
| Private                                     | 2326 (56.77)           | 3105 (58.8)            | 1372 (53.36)         | 173 (59.86)          |                        |
| Missing                                     | 56 (1.37)              | 75 (1.42)              | 45 (1.75)            | 13 (4.5)             |                        |
| <b>Diagnosis Year</b>                       |                        |                        |                      |                      |                        |
| 2007                                        | 1042 (25.43)           | 1343 (25.43)           | 674 (26.22)          | 85 (29.41)           | 0.58                   |
| 2008                                        | 1035 (25.26)           | 1318 (24.96)           | 636 (24.74)          | 72 (24.91)           |                        |
| 2009                                        | 1027 (25.07)           | 1263 (23.92)           | 643 (25.01)          | 68 (23.53)           |                        |
| 2010                                        | 993 (24.24)            | 1357 (25.7)            | 618 (24.04)          | 64 (22.15)           |                        |
| <b>Stage</b>                                |                        |                        |                      |                      |                        |
| Stage II                                    | 1655 (40.4)            | 2075 (39.29)           | 1107 (43.06)         | 137 (47.4)           | 0.0013                 |
| Stage III                                   | 2442 (59.6)            | 3206 (60.71)           | 1464 (56.94)         | 152 (52.6)           |                        |
| <b>Rural/Urban</b>                          |                        |                        |                      |                      |                        |
| Rural                                       | 114 (2.78)             | 1092 (20.68)           | 1731 (67.33)         | 129 (44.64)          | < 0.0001               |
| Urban                                       | 3902 (95.24)           | 4076 (77.18)           | 804 (31.27)          | 154 (53.29)          |                        |
| Unknown                                     | 81 (1.98)              | 113 (2.14)             | 36 (1.4)             | 6 (2.08)             |                        |
| <b>Region</b>                               |                        |                        |                      |                      |                        |
| Northeast                                   | 893 (21.8)             | 1088 (20.6)            | 282 (10.97)          | 16 (5.54)            | < 0.0001               |
| Midwest                                     | 935 (22.82)            | 1362 (25.79)           | 829 (32.24)          | 68 (23.53)           |                        |
| South                                       | 1449 (35.37)           | 2073 (39.25)           | 1089 (42.36)         | 120 (41.52)          |                        |
| West                                        | 820 (20.01)            | 758 (14.35)            | 371 (14.43)          | 85 (29.41)           |                        |
| <b>Median Income-Quartile 2000</b>          |                        |                        |                      |                      |                        |
| <\$30,000                                   | 478 (11.67)            | 477 (9.03)             | 739 (28.74)          | 59 (20.42)           | < 0.0001               |
| \$30,000- \$34,999                          | 623 (15.21)            | 906 (17.16)            | 840 (32.67)          | 77 (26.64)           |                        |

|                                   |                                        |              |              |              |             |          |
|-----------------------------------|----------------------------------------|--------------|--------------|--------------|-------------|----------|
|                                   | \$35,000- \$45,999                     | 1132 (27.63) | 1437 (27.21) | 656 (25.52)  | 70 (24.22)  |          |
|                                   | \$46,000+                              | 1825 (44.54) | 2385 (45.16) | 309 (12.02)  | 77 (26.64)  |          |
|                                   | Missing                                | 39 (0.95)    | 76 (1.44)    | 27 (1.05)    | 6 (2.08)    |          |
| <b>Facility Type</b>              |                                        |              |              |              |             |          |
|                                   | Community Cancer Program               | 404 (9.86)   | 457 (8.65)   | 105 (4.08)   | 14 (4.84)   | < 0.0001 |
|                                   | Comprehensive Community Cancer Program | 1919 (46.84) | 2286 (43.29) | 1000 (38.9)  | 86 (29.76)  |          |
|                                   | Academic Comprehensive Cancer Program  | 912 (22.26)  | 1200 (22.72) | 646 (25.13)  | 47 (16.26)  |          |
|                                   | NCI Program/Network                    | 340 (8.3)    | 812 (15.38)  | 672 (26.14)  | 137 (47.4)  |          |
|                                   | Other                                  | 522 (12.74)  | 526 (9.96)   | 148 (5.76)   | 5 (1.73)    |          |
| <b>Charlson Comorbidity Score</b> |                                        |              |              |              |             |          |
|                                   | 0                                      | 3275 (79.94) | 4229 (80.08) | 1963 (76.35) | 241 (83.39) | 0.002    |
|                                   | 1                                      | 636 (15.52)  | 826 (15.64)  | 469 (18.24)  | 39 (13.49)  |          |
|                                   | 2+                                     | 186 (4.54)   | 226 (4.28)   | 139 (5.41)   | 9 (3.11)    |          |

\* RT, Radiation Therapy; NCI, National Cancer Institute



**(Online Only) Table S3. The likelihood of receipt of radiation therapy among stage II-III rectal cancer patients by diagnosis location**

| Categories                                  | Diagnosed at reporting facility |         | Diagnosed elsewhere |         |
|---------------------------------------------|---------------------------------|---------|---------------------|---------|
|                                             | OR(95% CI)                      | p value | OR(95% CI)          | p value |
| <b>Travel distance</b>                      |                                 |         |                     |         |
| 0-12.49 miles                               | 1                               |         | 1                   |         |
| 12.5-49.9 miles                             | 0.95(0.87-1.03)                 | 0.1917  | 1.12(1.02-1.24)     | 0.0192  |
| 50-249 miles                                | 0.76(0.65-0.88)                 | 0.0004  | 1.05(0.91-1.21)     | 0.5067  |
| ≥250 miles                                  | 0.45(0.28-0.74)                 | 0.0013  | 1.03(0.76-1.38)     | 0.8606  |
| <b>Density of Radiation Oncologist (RO)</b> |                                 |         |                     |         |
| No RO                                       | 0.91(0.78-1.06)                 | 0.2327  | 1.21(1.01-1.45)     | 0.0405  |
| RO Q1 (low)                                 | 0.83(0.7-0.98)                  | 0.0245  | 0.99(0.82-1.21)     | 0.9417  |
| RO Q2                                       | 0.89(0.76-1.05)                 | 0.1722  | 1.02(0.84-1.24)     | 0.8364  |
| RO Q3                                       | 0.9(0.76-1.06)                  | 0.1969  | 0.92(0.76-1.12)     | 0.4176  |
| RO Q4 (high)                                | 1                               |         | 1                   |         |
| <b>Age Group, yrs</b>                       |                                 |         |                     |         |
| 18-50                                       | 1                               |         | 1                   |         |
| 51-64                                       | 0.81(0.73-0.89)                 | <.0001  | 0.97(0.87-1.08)     | 0.5734  |
| 65-70                                       | 0.63(0.53-0.74)                 | <.0001  | 0.78(0.65-0.95)     | 0.0142  |
| 71-75                                       | 0.48(0.4-0.57)                  | <.0001  | 0.63(0.51-0.77)     | <.0001  |
| 76-80                                       | 0.35(0.29-0.41)                 | <.0001  | 0.53(0.42-0.67)     | <.0001  |
| <b>Race/Ethnicity</b>                       |                                 |         |                     |         |
| Non-Hispanic white                          | 1                               |         | 1                   |         |
| Hispanic                                    | 0.82(0.69-0.96)                 | 0.0148  | 0.85(0.71-1.01)     | 0.0631  |
| Black                                       | 0.74(0.65-0.83)                 | <.0001  | 0.91(0.77-1.08)     | 0.2942  |
| Others                                      | 0.84(0.71-1)                    | 0.0452  | 0.86(0.72-1.03)     | 0.1046  |
| Missing                                     | 1.04(0.88-1.21)                 | 0.6657  | 0.87(0.73-1.03)     | 0.103   |
| <b>Gender</b>                               |                                 |         |                     |         |
| Male                                        | 1                               |         | 1                   |         |
| Female                                      | 0.78(0.73-0.84)                 | <.0001  | 0.83(0.77-0.91)     | <.0001  |
| <b>Insurance</b>                            |                                 |         |                     |         |
| Private                                     | 1                               |         | 1                   |         |
| Uninsured, self-pay                         | 1.12(0.92-1.37)                 | 0.2476  | 1.48(1.07-2.04)     | 0.0186  |
| Uninsured, charity-waive                    | 1.11(0.85-1.44)                 | 0.4416  | 1.28(0.85-1.91)     | 0.2323  |
| Medicaid                                    | 0.98(0.85-1.14)                 | 0.8306  | 1.26(1.03-1.54)     | 0.0268  |
| Younger Medicare                            | 0.93(0.78-1.11)                 | 0.4126  | 0.93(0.76-1.14)     | 0.4869  |
| Older Medicare                              | 1.07(0.93-1.23)                 | 0.3711  | 1.12(0.94-1.34)     | 0.2129  |
| Missing                                     | 0.86(0.63-1.17)                 | 0.3332  | 1.26(0.88-1.8)      | 0.1996  |
| <b>Stage</b>                                |                                 |         |                     |         |
| Stage II                                    | 1                               |         | 1                   |         |
| Stage III                                   | 1.07(0.99-1.14)                 | 0.0785  | 0.9(0.83-0.98)      | 0.019   |
| <b>Charlson Comorbidity Score</b>           |                                 |         |                     |         |
| 0                                           | 1                               |         | 1                   |         |
| 1                                           | 0.84(0.77-0.91)                 | <.0001  | 0.82(0.73-0.93)     | 0.0013  |
| 2+                                          | 0.64(0.56-0.73)                 | <.0001  | 0.65(0.54-0.78)     | <.0001  |
| <b>Diagnosis Year</b>                       |                                 |         |                     |         |
| 2007                                        | 1                               |         | 1                   |         |
| 2008                                        | 0.99(0.9-1.09)                  | 0.7894  | 0.98(0.86-1.1)      | 0.7029  |
| 2009                                        | 1.04(0.95-1.15)                 | 0.3769  | 1.04(0.92-1.18)     | 0.5442  |
| 2010                                        | 1.04(0.94-1.15)                 | 0.4245  | 1.07(0.95-1.2)      | 0.2942  |
| <b>Median Income-Quartile 2000</b>          |                                 |         |                     |         |
| <\$30,000                                   | 1.07(0.96-1.21)                 | 0.228   | 0.99(0.86-1.14)     | 0.88    |

|                      |                                        |                 |        |                 |        |
|----------------------|----------------------------------------|-----------------|--------|-----------------|--------|
|                      | \$30,000- \$34,999                     | 1.13(1.01-1.26) | 0.0261 | 1.15(1.02-1.3)  | 0.0274 |
|                      | \$35,000- \$45,999                     | 1.07(0.98-1.17) | 0.1303 | 1.11(1-1.23)    | 0.0562 |
|                      | \$46,000+                              | 1               |        | 1               |        |
|                      | Missing                                | 1.18(0.85-1.63) | 0.3202 | 1.24(0.83-1.85) | 0.2939 |
| <b>Facility Type</b> |                                        |                 |        |                 |        |
|                      | Community Cancer Program               | 1               |        | 1               |        |
|                      | Comprehensive Community Cancer Program | 1.26(1.1-1.43)  | 0.0006 | 0.95(0.79-1.14) | 0.5941 |
|                      | Academic comprehensive Cancer Program  | 1.04(0.89-1.2)  | 0.64   | 0.98(0.8-1.2)   | 0.8398 |
|                      | NCI Program/Network                    | 1.57(1.22-2.01) | 0.0005 | 1.1(0.89-1.37)  | 0.373  |
|                      | Other                                  | 1.32(1.1-1.58)  | 0.0032 | 1.09(0.86-1.37) | 0.4921 |
| <b>Region</b>        |                                        |                 |        |                 |        |
|                      | Northeast                              | 1               |        | 1               |        |
|                      | Midwest                                | 1.19(1.05-1.35) | 0.0064 | 1.45(1.25-1.69) | <.0001 |
|                      | South                                  | 0.94(0.83-1.07) | 0.3696 | 1.05(0.92-1.2)  | 0.4678 |
|                      | West                                   | 0.97(0.84-1.13) | 0.7037 | 1.08(0.91-1.27) | 0.3815 |

---

**(Online Only) Table S4. Characteristics of Stage II-III rectal cancer patients reported by the NCDB and the SEER18\*, 2007-2010**

| Characteristic        | NCDB, pre-exclusion cohort | SEER18           |
|-----------------------|----------------------------|------------------|
|                       | N=35854<br>N (%)           | N=12908<br>N (%) |
| <b>Race/Ethnicity</b> |                            |                  |
| Non-Hispanic White    | 26007 (72.5)               | 8878 (68.8)      |
| Hispanic              | 2173 (6.1)                 | 1387 (10.8)      |
| Black                 | 3349 (9.3)                 | 1196 (9.3)       |
| Other/Unknown         | 4325 (12.1)                | 1447 (11.2)      |
| <b>Age, years</b>     |                            |                  |
| 18-50                 | 8137 (22.7)                | 2878 (22.3)      |
| 51-64                 | 14239 (39.7)               | 5177 (40.1)      |
| 65-70                 | 5952 (16.6)                | 2133 (16.5)      |
| 71-75                 | 4071 (11.4)                | 1459 (11.3)      |
| 76-80                 | 3455 (9.6)                 | 1261 (9.8)       |
| <b>Sex</b>            |                            |                  |
| Male                  | 21858 (61.0)               | 7865 (60.9)      |
| Female                | 13996 (39.0)               | 5043 (39.1)      |
| <b>Cancer Stage</b>   |                            |                  |
| II                    | 15435 (43.0)               | 5555 (43.0)      |
| III                   | 20419 (57.0)               | 7353 (57.0)      |
| <b>Diagnosis Year</b> |                            |                  |
| 2007                  | 9247 (25.8)                | 3214 (24.9)      |
| 2008                  | 8997 (25.1)                | 3113 (24.1)      |
| 2009                  | 8811 (24.6)                | 3232 (25.0)      |
| 2010                  | 8799 (24.5)                | 3349 (26.0)      |

\*SEER18: Surveillance, Epidemiology, and End Results 18; NCDB, National Cancer Data Base
